# Supplementary material for: Probing T-cell response by sequence-based probabilistic modeling
Source: PubMed Central journal article supplement (PMC8476001; doi:10.1371/journal.pcbi.1009297), 2021-09-02

**RBM-LR**  $P_{21}^{NA}(\boldsymbol{\sigma}) \sim e^{\sum_{i=1}^{N^\sigma} (g_i^L(\sigma_i) + g_{i-N^\sigma-1}^R(\sigma_i)) + \sum_{\mu=1}^{N^h} \Gamma_\mu \left( \underbrace{\sum_i (w_{i,\mu}^L(\sigma_i) + w_{i-N^\sigma-1,\mu}^R(\sigma_i))}_{\text{Weights (Left-Right)}} \right)}$

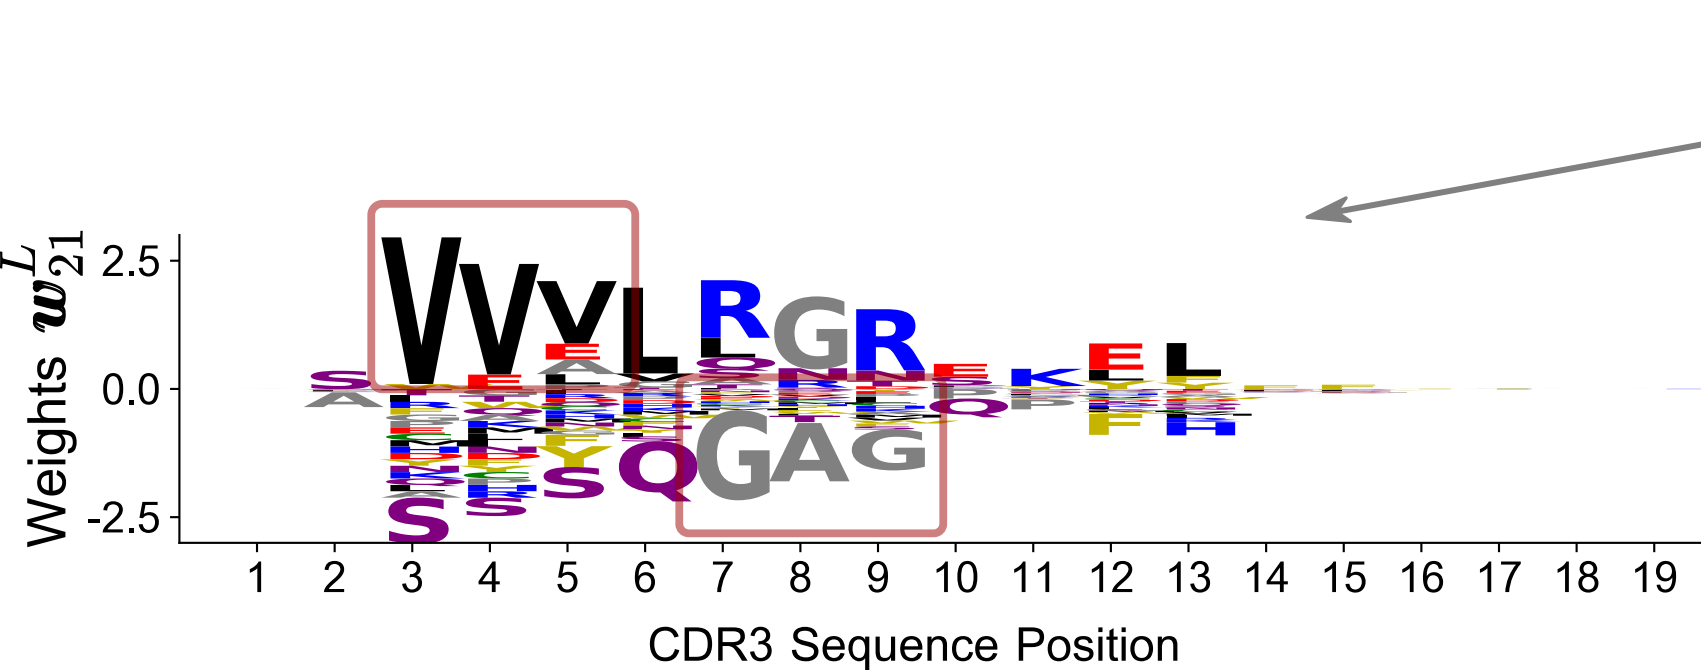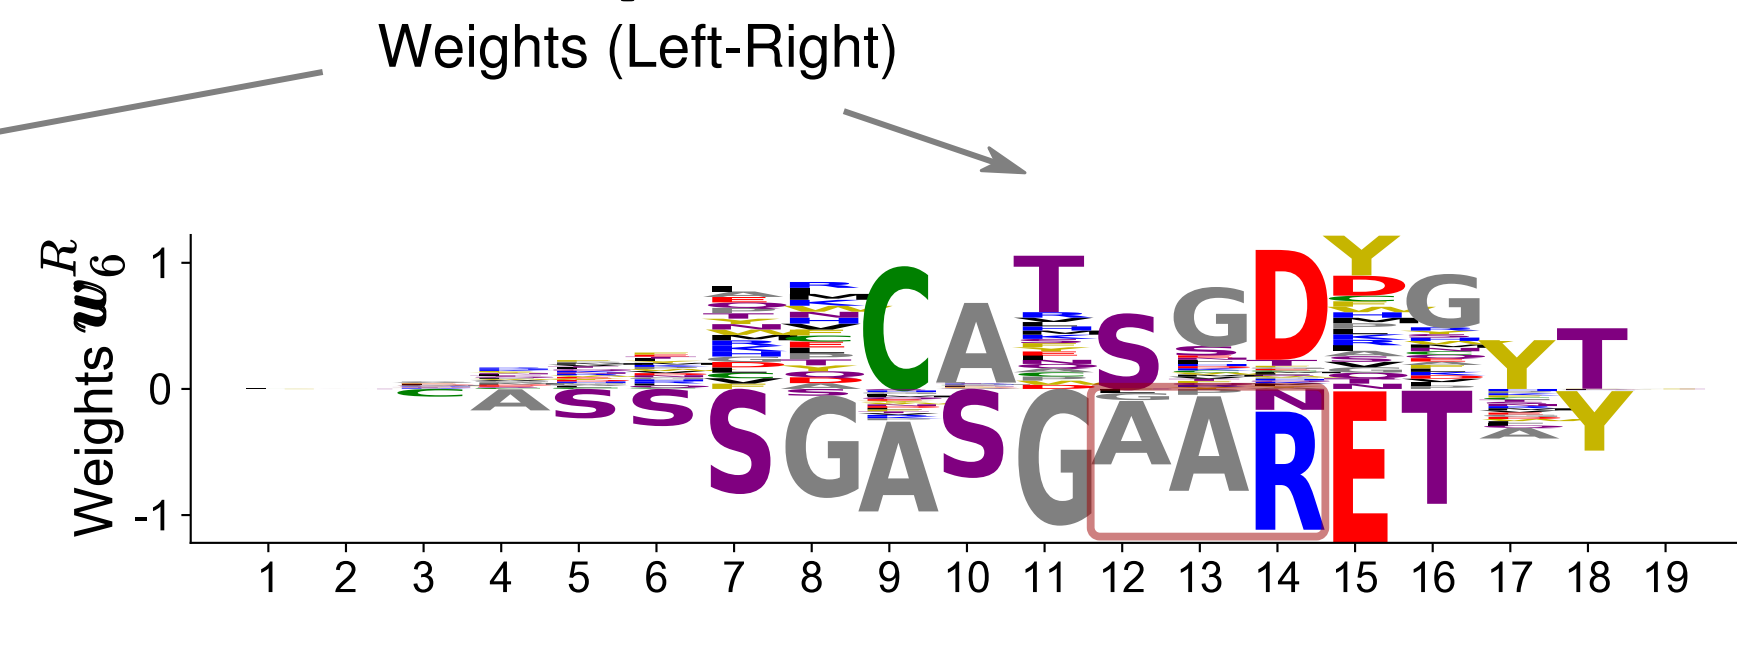

Supplement: pcbi.1009297.s002.pdf [file pcbi.1009297.s002.pdf]
