# Supplementary material for: Probing T-cell response by sequence-based probabilistic modeling
Source: PubMed Central journal article supplement (PMC8476001; doi:10.1371/journal.pcbi.1009297), 2021-09-02

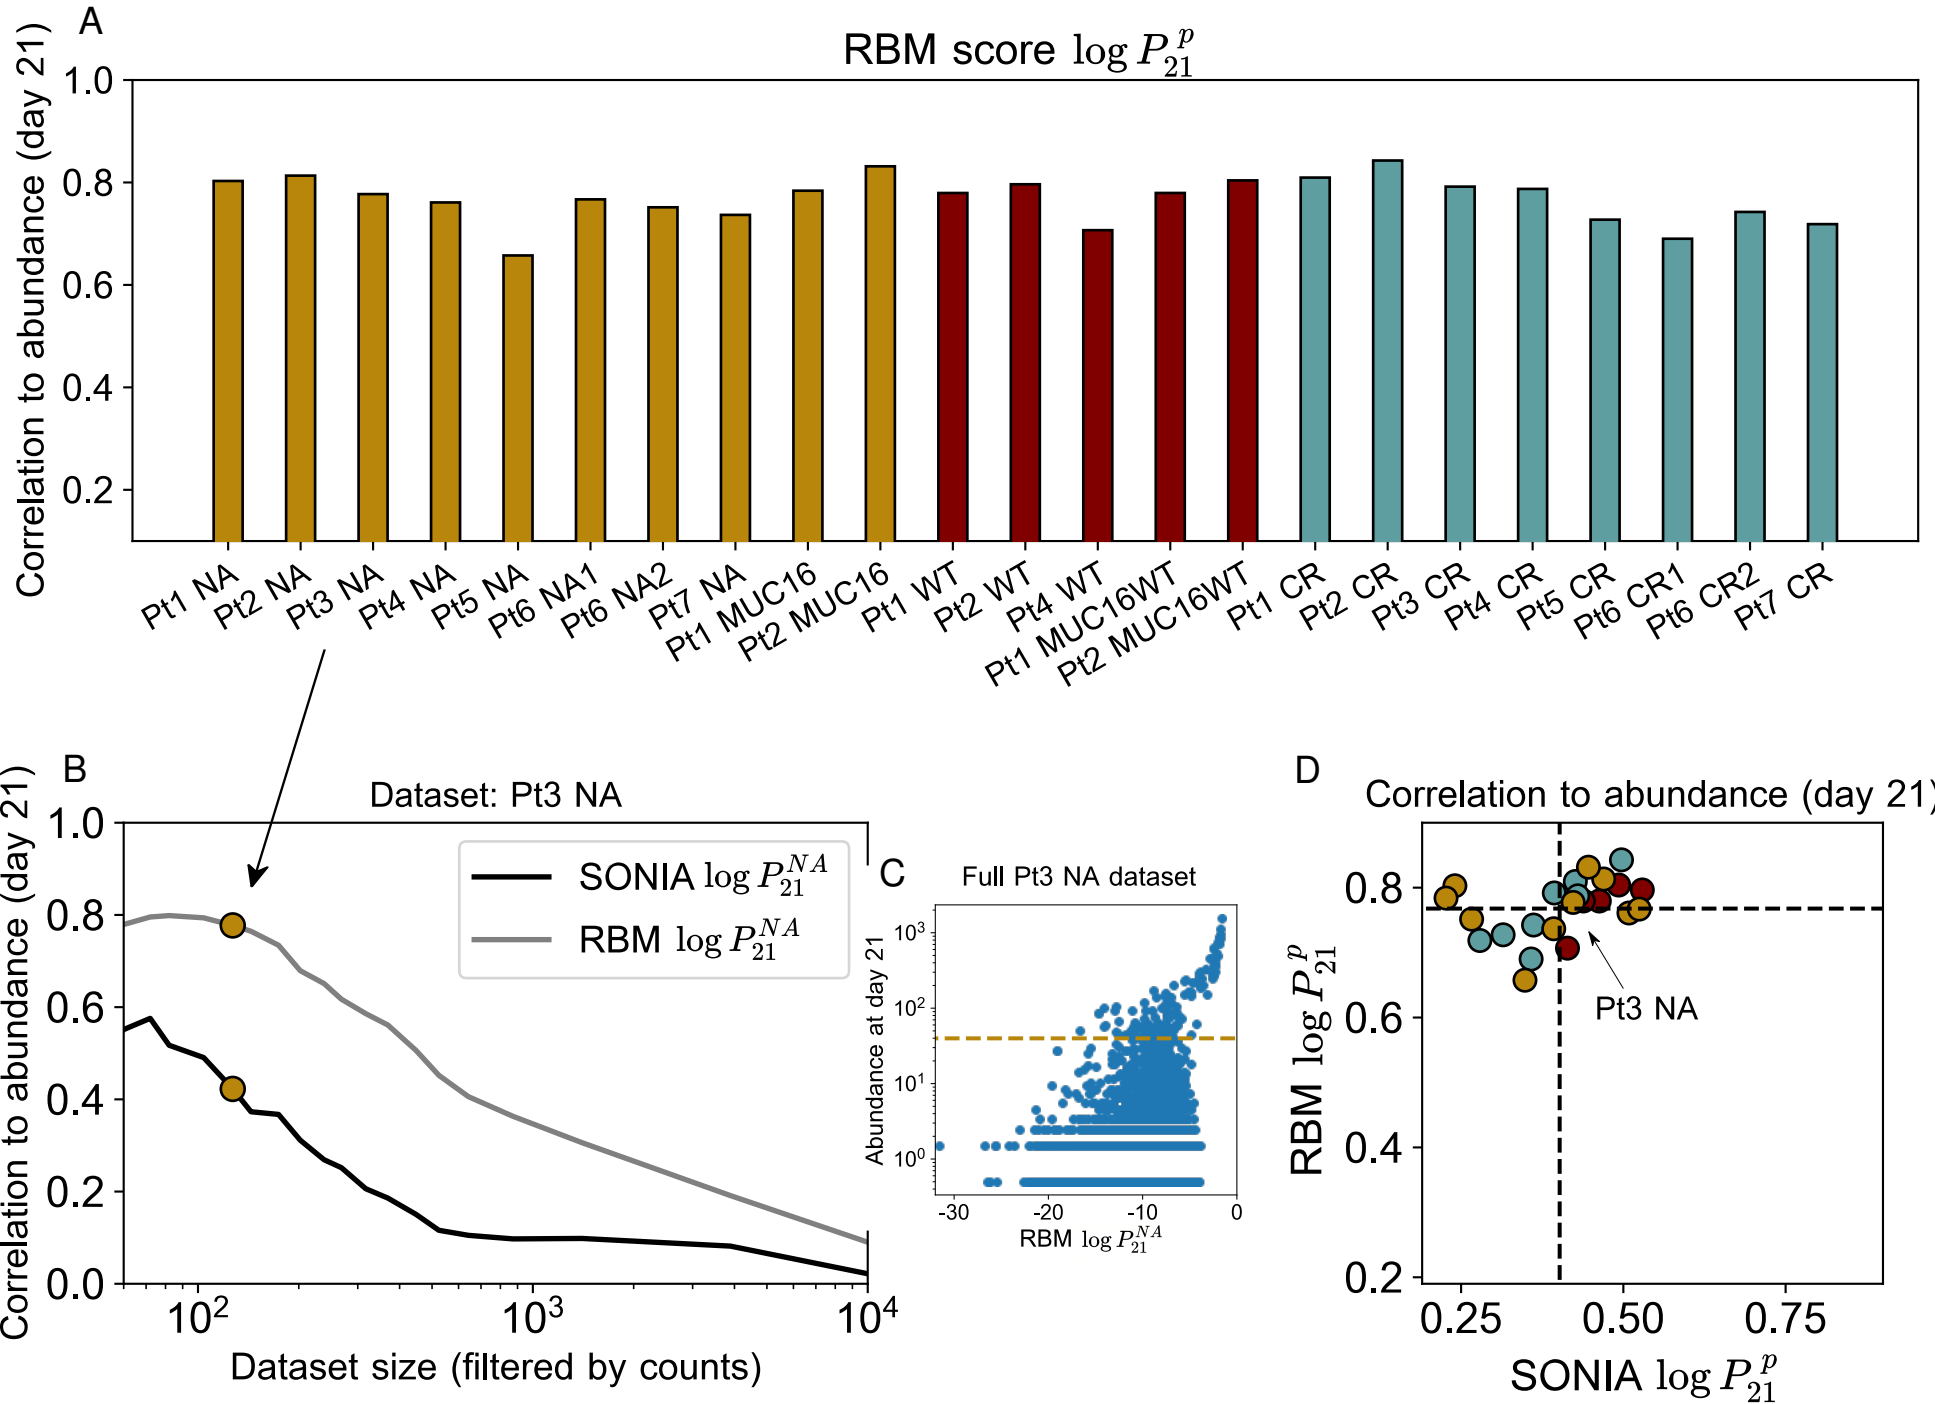

Supplement: pcbi.1009297.s003.pdf [file pcbi.1009297.s003.pdf]
