# Supplementary material for: Probing T-cell response by sequence-based probabilistic modeling
Source: PubMed Central journal article supplement (PMC8476001; doi:10.1371/journal.pcbi.1009297), 2021-09-02

# TRB response to NA (Day 21, Pt3)

# TRB response to CR (Day 21, Pt5)

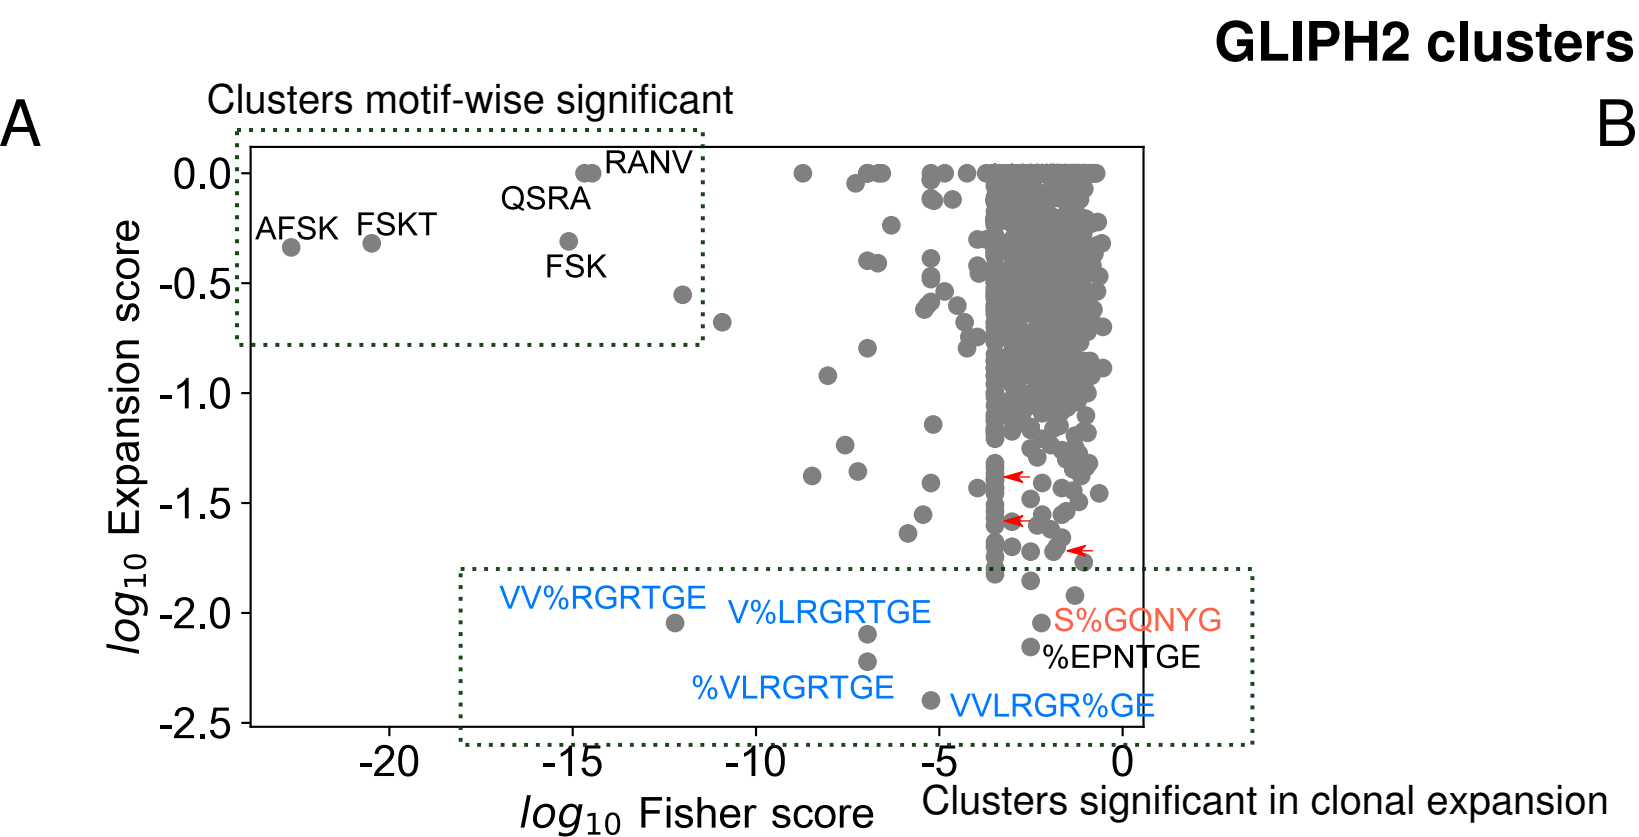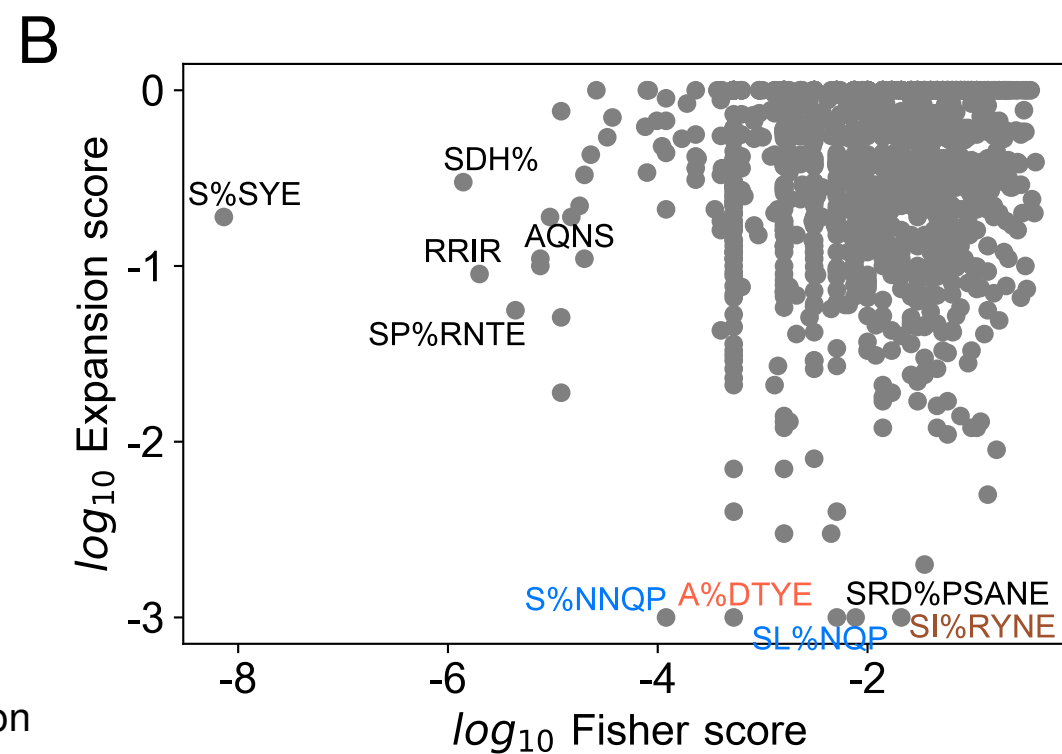

## RBM dimensionality reduction

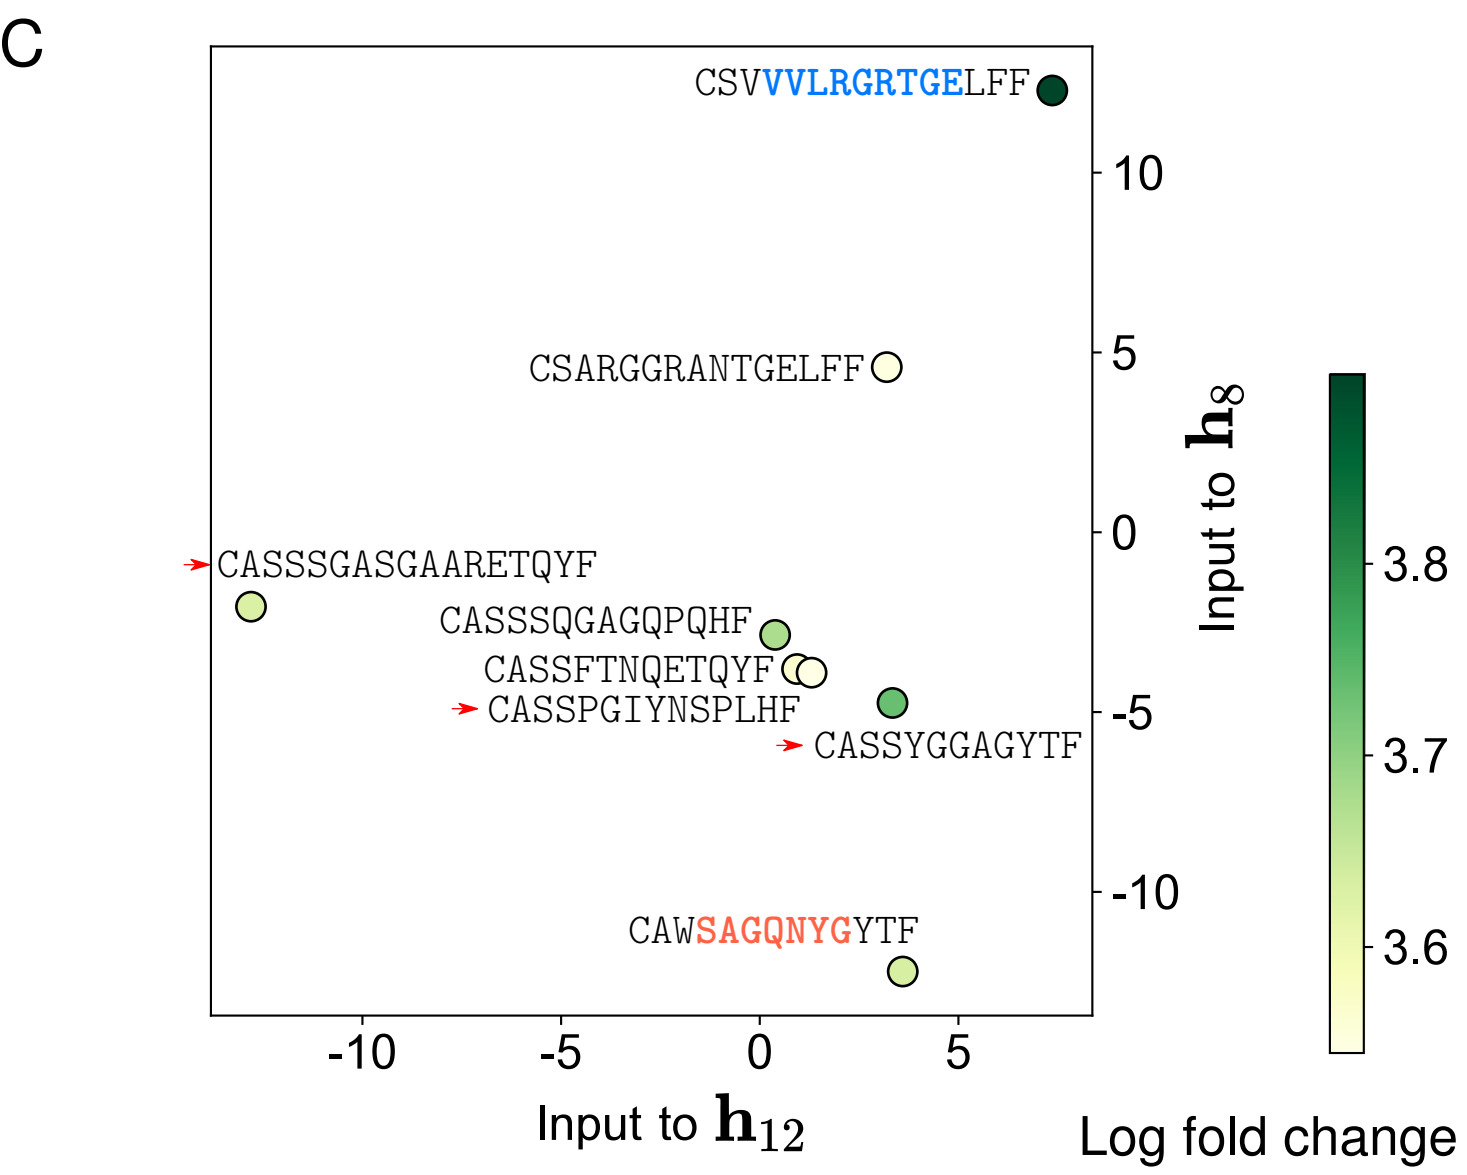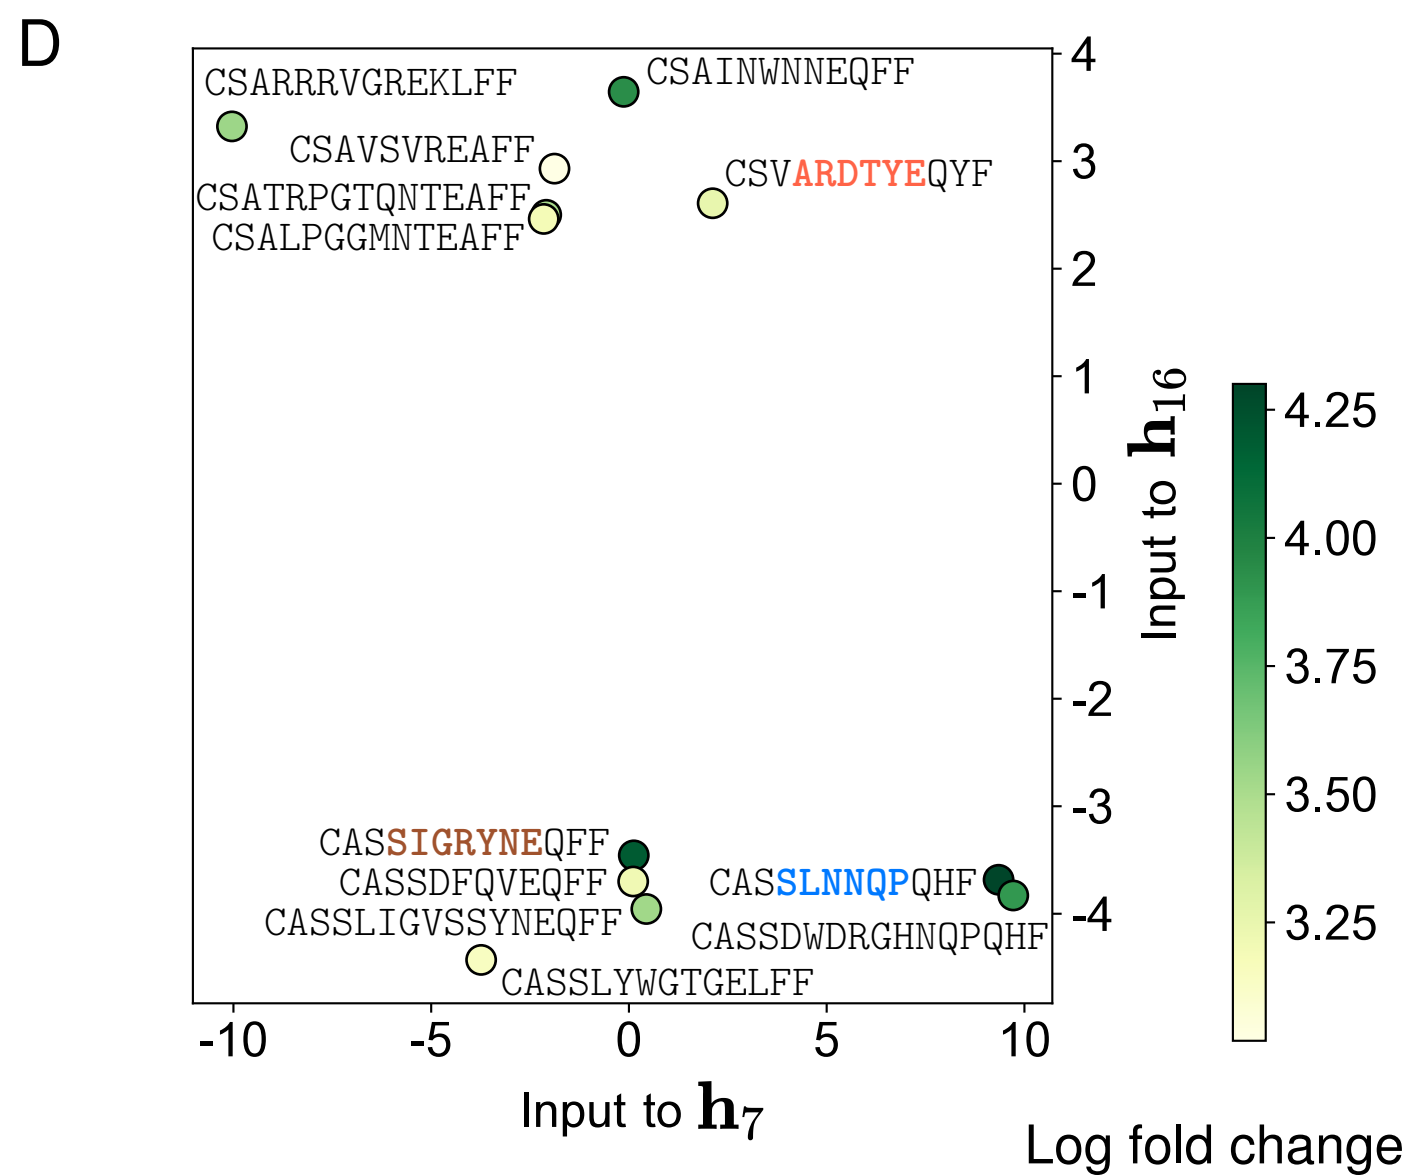

Supplement: pcbi.1009297.s008.pdf [file pcbi.1009297.s008.pdf]
